# Supplementary material for: Microwave-assisted synthesis of a novel modified polyacrylonitrile fiber and its adsorption performance for Cr(Ⅵ)
Source: Research Square preprint supplement (doi:10.21203/rs.3.rs-7541304/v1), 2025-09-22
Supplement: Supplementary file 2 [file 3bbe66907b6d4466fa2fdf27.docx]

**Highlights**

- PAN-TAP fiber can be prepared in only 30 min, which is significantly shorter than the conventional preparation time of 6 h-24 h, which can reduce energy consumption and save time.
- PAN-TAP fiber has selective adsorption for Cr (Ⅵ) in acidic environment.
- PAN-TAP fiber can reach adsorption equilibrium in only 60min, which is 1/2-1/6 of that of other materials in 1 h-6 h.
- The adsorption capacity of PAN-TAP fiber for Cr (Ⅵ) reached 287.1 mg/g at 298K
- XPS analysis shows that the adsorption mechanism is that Cr (Ⅵ) is reduced to Cr (Ⅲ) by amino groups and is fixed on the fiber by binding with N atoms.
