# Supplementary figures and images for: Microwave-assisted synthesis of a novel modified polyacrylonitrile fiber and its adsorption performance for Cr(Ⅵ)
Source: Research Square preprint supplement (doi:10.21203/rs.3.rs-7541304/v1), 2025-09-22

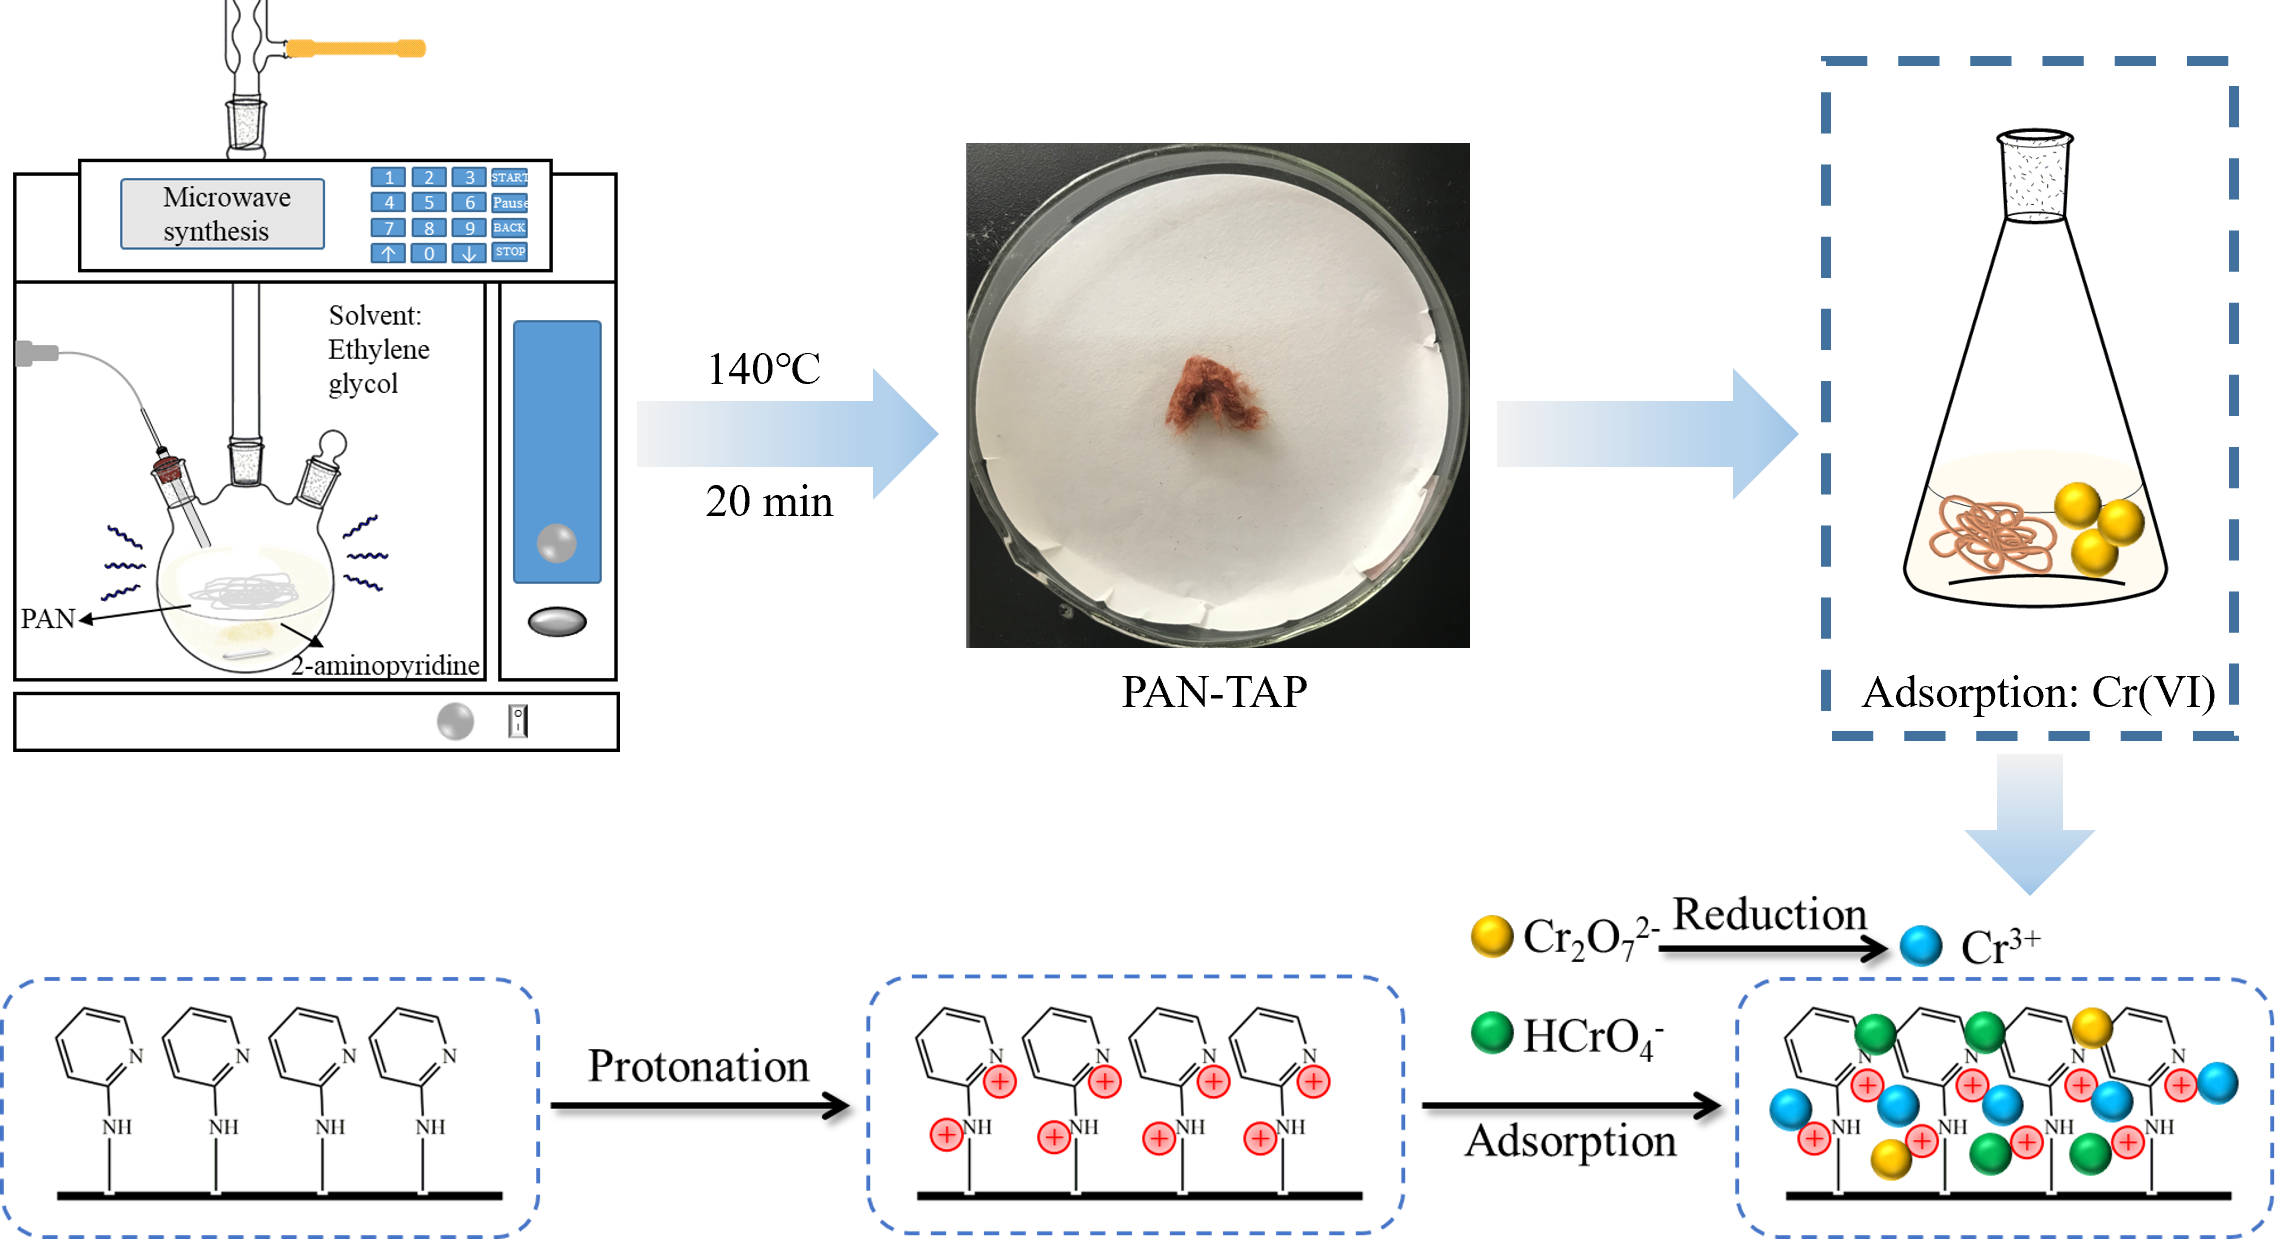

Supplement: Supplementary file 1 [file 34d698fa0c1c2db158d40482.docx]
